# Supplementary material for: Proton transfer induced excited-state aromaticity gain for chromophores with maximal Stokes shifts
Source: Royal Society of Chemistry journal article supplement (doi:10.1039/d4sc04692g), 2024-01-01
Supplement: d4sc04692g1.pdf [file d4sc04692g1.pdf]

## Supporting Information

# Proton transfer induced excited-state aromaticity gain for chromophores with maximal Stokes shifts

Dong Xing, Florian Glöcklhofer, and Felix Plasser

E-mail: f.plasser@lboro.ac.uk

Phone: +44 1509 226946

### Table of contents

|                                                        |    |
|--------------------------------------------------------|----|
| 1. Aromaticity Analysis.....                           | 2  |
| 2. Natural transition orbitals (NTOs).....             | 15 |
| 3. COT derivatives.....                                | 27 |
| 4. Ground-state tautomers.....                         | 29 |
| 5. Further computational and experimental results..... | 30 |
| 6. References.....                                     | 32 |

## 1. Aromaticity Analysis

Nucleus-independent chemical shifts (NICS)<sup>1</sup> were calculated at PBE0/def2-SVP level<sup>2,3</sup> using gauge including atomic orbitals as implemented in Gaussian 09<sup>4</sup>. NICS tensors were represented graphically using the visualization of chemical shielding tensors (VIST)<sup>5</sup> method as implemented in TheoDORE<sup>6</sup> and using VMD<sup>7</sup> as a graphical interface. Note that all the presented Q forms are optimized in the S<sub>0</sub> state and all A forms in the S<sub>1</sub> state. The aromatic fluctuation index (FLU)<sup>8</sup>, multicenter bond indices MCI<sup>9</sup> and Iring<sup>10</sup> were computed for molecules 3a and 5 with the AIMALL<sup>11</sup> added and ESI-3D<sup>12</sup> programs.

Table S1. The out-of-plane component of NICS value (ppm) at the ring with carbonyl or hydroxyl groups (Ring 1) and further fused ring(s) (Ring 2, 3 and 4) for Molecules

**1-9.** (Values smaller than 5 ppm are labeled as “small”)

| Molecule  | State              | Ring 1 | Ring 2 | Ring 3 | Ring 4 |
|-----------|--------------------|--------|--------|--------|--------|
| <b>1</b>  | Q(S <sub>0</sub> ) | 13     | -23    |        |        |
|           | Q(T <sub>1</sub> ) | 39.2   | 31.3   |        |        |
|           | A(T <sub>1</sub> ) | -12    | -14    |        |        |
|           | A(S <sub>0</sub> ) | 378.9  | 152.1  |        |        |
| <b>2a</b> | Q(S <sub>0</sub> ) | 13.2   | -22.1  | -27.7  |        |
|           | Q(T <sub>1</sub> ) | 11.2   | 32.8   | small  |        |
|           | A(T <sub>1</sub> ) | -12.4  | -14.3  | -18.3  |        |
|           | A(S <sub>0</sub> ) | 106.9  | 33.9   | small  |        |
| <b>2b</b> | Q(S <sub>0</sub> ) | 14.9   | -23.3  | -27.3  |        |
|           | Q(T <sub>1</sub> ) | 25.3   | 64.5   | 19.7   |        |
|           | A(T <sub>1</sub> ) | -13.1  | -7.6   | 42.9   |        |
|           | A(S <sub>0</sub> ) | 499.8  | 126.5  | -27.9  |        |
| <b>3a</b> | Q(S <sub>0</sub> ) | 12     | -19.7  | -27.9  |        |
|           | Q(T <sub>1</sub> ) | 8.8    | 19.7   | small  |        |
|           | A(T <sub>1</sub> ) | -10.9  | -15.6  | -17.6  |        |
|           | A(S <sub>0</sub> ) | 96.5   | 33.2   | 5.5    |        |
| <b>3b</b> | Q(S <sub>0</sub> ) | 12.1   | -21.9  | -28.1  |        |

|           |                    |       |       |       |       |
|-----------|--------------------|-------|-------|-------|-------|
|           | Q(T <sub>1</sub> ) | 9.4   | 25.2  | small |       |
|           | A(T <sub>1</sub> ) | -12.1 | -12.3 | -19.4 |       |
|           | A(S <sub>0</sub> ) | 94.5  | 24.1  | -8.7  |       |
|           |                    |       |       |       |       |
| <b>4</b>  | Q(S <sub>0</sub> ) | 10.5  | -19.7 | -28.2 |       |
|           | Q(T <sub>1</sub> ) | 6.3   | 18.5  | small |       |
|           | A(T <sub>1</sub> ) | -10.3 | -13.3 | -17.7 |       |
|           | A(S <sub>0</sub> ) | 87.2  | 27.2  | -8    |       |
|           |                    |       |       |       |       |
| <b>5</b>  | Q(S <sub>0</sub> ) | 10.7  | small |       |       |
|           | Q(T <sub>1</sub> ) | -17   | 68.9  |       |       |
|           | A(T <sub>1</sub> ) | -28.4 | -15.5 |       |       |
|           | A(S <sub>0</sub> ) | 127.5 | 103.3 |       |       |
|           |                    |       |       |       |       |
| <b>6</b>  | Q(S <sub>0</sub> ) | 9.8   | small | 23.2  |       |
|           | Q(T <sub>1</sub> ) | small | 32.4  | small |       |
|           | A(T <sub>1</sub> ) | -23.3 | small | -19.1 |       |
|           | A(S <sub>0</sub> ) | 114.9 | 73.7  | 15.6  |       |
|           |                    |       |       |       |       |
| <b>7a</b> | Q(S <sub>0</sub> ) | 11.7  | 5.7   |       |       |
|           | Q(T <sub>1</sub> ) | small | 19.5  |       |       |
|           | A(T <sub>1</sub> ) | -24.4 | -14.5 |       |       |
|           | A(S <sub>0</sub> ) | 230.1 | 157   |       |       |
|           |                    |       |       |       |       |
| <b>7b</b> | Q(S <sub>0</sub> ) | 9.1   | small |       |       |
|           | Q(T <sub>1</sub> ) | small | 17.8  |       |       |
|           | A(T <sub>1</sub> ) | -21   | -21.9 |       |       |
|           | A(S <sub>0</sub> ) | 65.4  | 56    |       |       |
|           |                    |       |       |       |       |
| <b>8</b>  | Q(S <sub>0</sub> ) | 9.9   | small |       |       |
|           | Q(T <sub>1</sub> ) | small | 27.7  |       |       |
|           | A(T <sub>1</sub> ) | -25.9 | -20.5 |       |       |
|           | E(S <sub>0</sub> ) | 77.2  | 61.1  |       |       |
|           |                    |       |       |       |       |
| <b>9</b>  | Q(S <sub>0</sub> ) | 24.2  | 8.2   | 10.7  | small |
|           | Q(T <sub>1</sub> ) | 17.3  | small | 15.7  | 5     |
|           | A(T <sub>1</sub> ) | 23.3  | 11.5  | small | small |
|           | A(S <sub>0</sub> ) | 49.5  | 27.7  | 152   | 121.7 |

Table S2. Aromaticity descriptors for S<sub>0</sub> and T<sub>1</sub> states of molecules **3a** and **5**.<sup>a</sup>

|                       |                            | FLU <sup>b</sup> | I <sub>ring</sub> | MCI   | FLU (α/β)   | ΔFLU <sub>αβ</sub> /FLU |
|-----------------------|----------------------------|------------------|-------------------|-------|-------------|-------------------------|
| 3a Q(S <sub>0</sub> ) | Ring1 (C <sub>6</sub> )    | 0.010            | 0.029             | 0.040 |             |                         |
|                       | Ring2 (C <sub>6</sub> )    | 0.023            | 0.019             | 0.025 |             |                         |
|                       | Ring3 (C <sub>4</sub> )    | 0.101            | 0.013             | 0.014 |             |                         |
|                       | Ring2+3 (C <sub>8</sub> )  | 0.055            | 0.001             | 0.001 |             |                         |
| 3a A(T <sub>1</sub> ) | Ring1 (C <sub>6</sub> )    | 0.023            | 0.018             | 0.024 | 0.016/0.034 | -0.783                  |
|                       | Ring2 (C <sub>6</sub> )    | 0.029            | 0.010             | 0.011 | 0.036/0.032 | 0.138                   |
|                       | Ring3 (C <sub>4</sub> )    | 0.054            | 0.024             | 0.044 | 0.056/0.068 | -0.222                  |
|                       | Ring2+3 (C <sub>8</sub> )  | 0.024            | 0.002             | 0.006 | 0.031/0.029 | 0.083                   |
| 5 Q(S <sub>0</sub> )  | Ring1 (C <sub>5</sub> )    | 0.033            | 0.021             | 0.017 |             |                         |
|                       | Ring2 (C <sub>5</sub> )    | 0.069            | 0.008             | 0.007 |             |                         |
|                       | Ring 1+2 (C <sub>8</sub> ) | 0.048            | 0.002             | 0.001 |             |                         |
| 5 A(T <sub>1</sub> )  | Ring1 (C <sub>5</sub> )    | 0.018            | 0.013             | 0.013 | 0.012/0.032 | -1.111                  |
|                       | Ring2 (C <sub>5</sub> )    | 0.028            | 0.014             | 0.015 | 0.017/0.045 | -1.000                  |
|                       | Ring1+2 (C <sub>8</sub> )  | 0.010            | 0.004             | 0.016 | 0.006/0.019 | -1.300                  |

<sup>a</sup> Ring1, Ring2, Ring3 are arranged from left to right in Figures 3 and 5 of the main article. Ring1+2 refers to the perimeter of Ring1 and Ring2 combined, etc.

<sup>b</sup> Values of FLU < 0.030 and FLU > 0.060 are highlighted in blue and red, respectively, to indicate aromaticity and antiaromaticity.

Table S3. VIST plots for Q and A form of molecule **1** in  $S_0$  and  $T_1$  states.

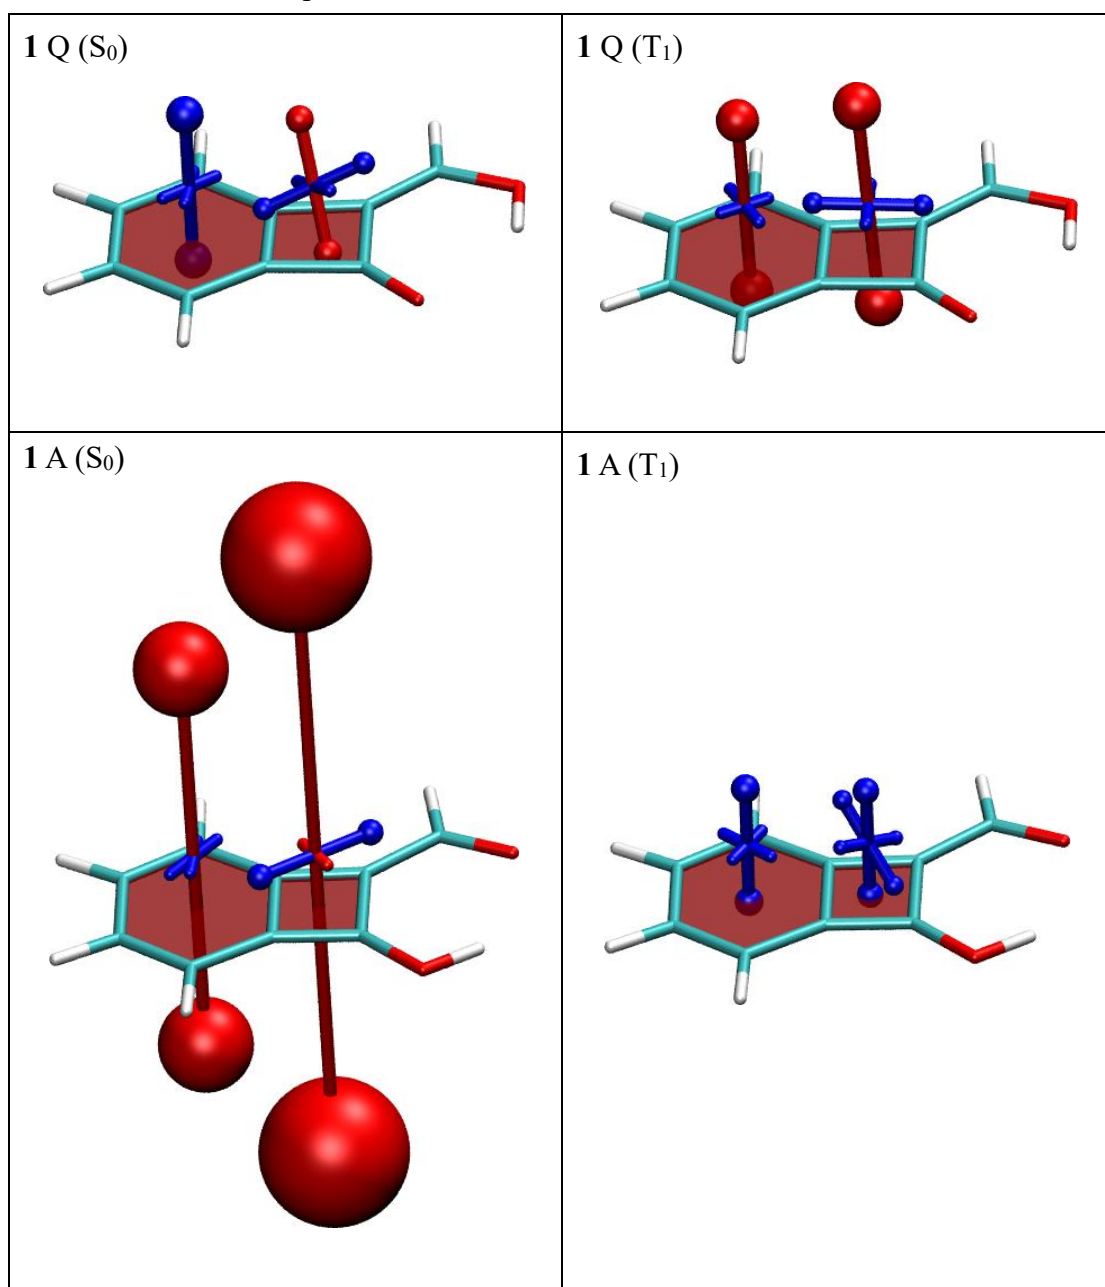

Table S4. VIST plots for Q and A form of molecule **2a** in  $S_0$  and  $T_1$  states.

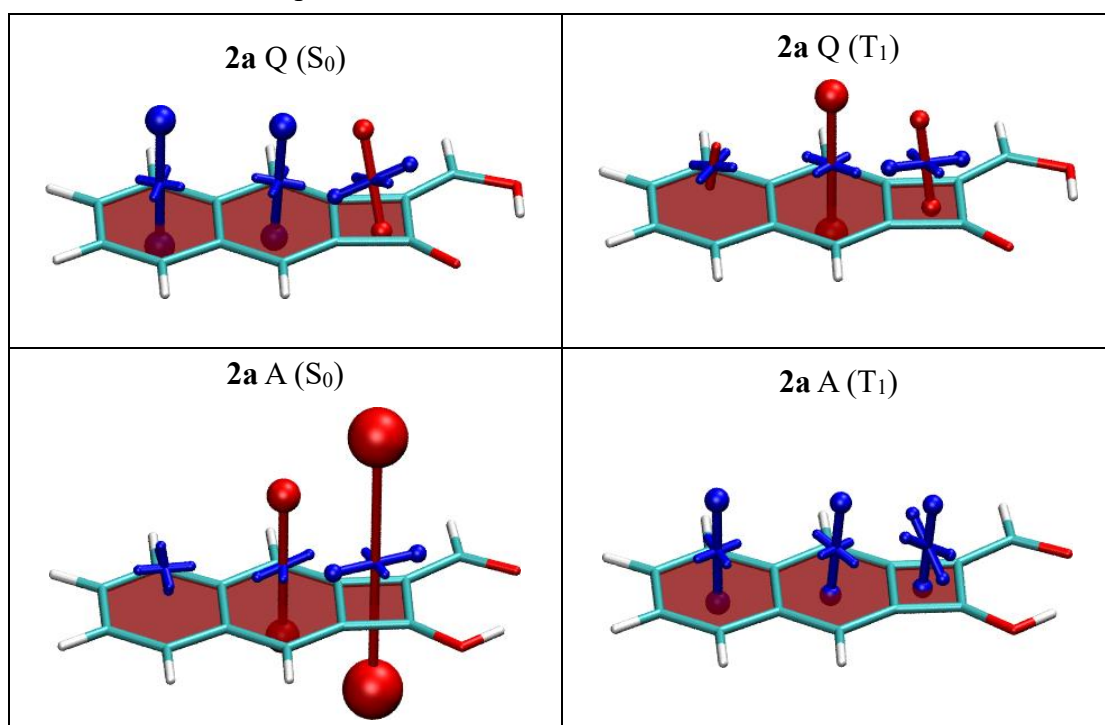

Table S5. VIST plots for Q and A form of molecule **2b** in  $S_0$  and  $T_1$  states.

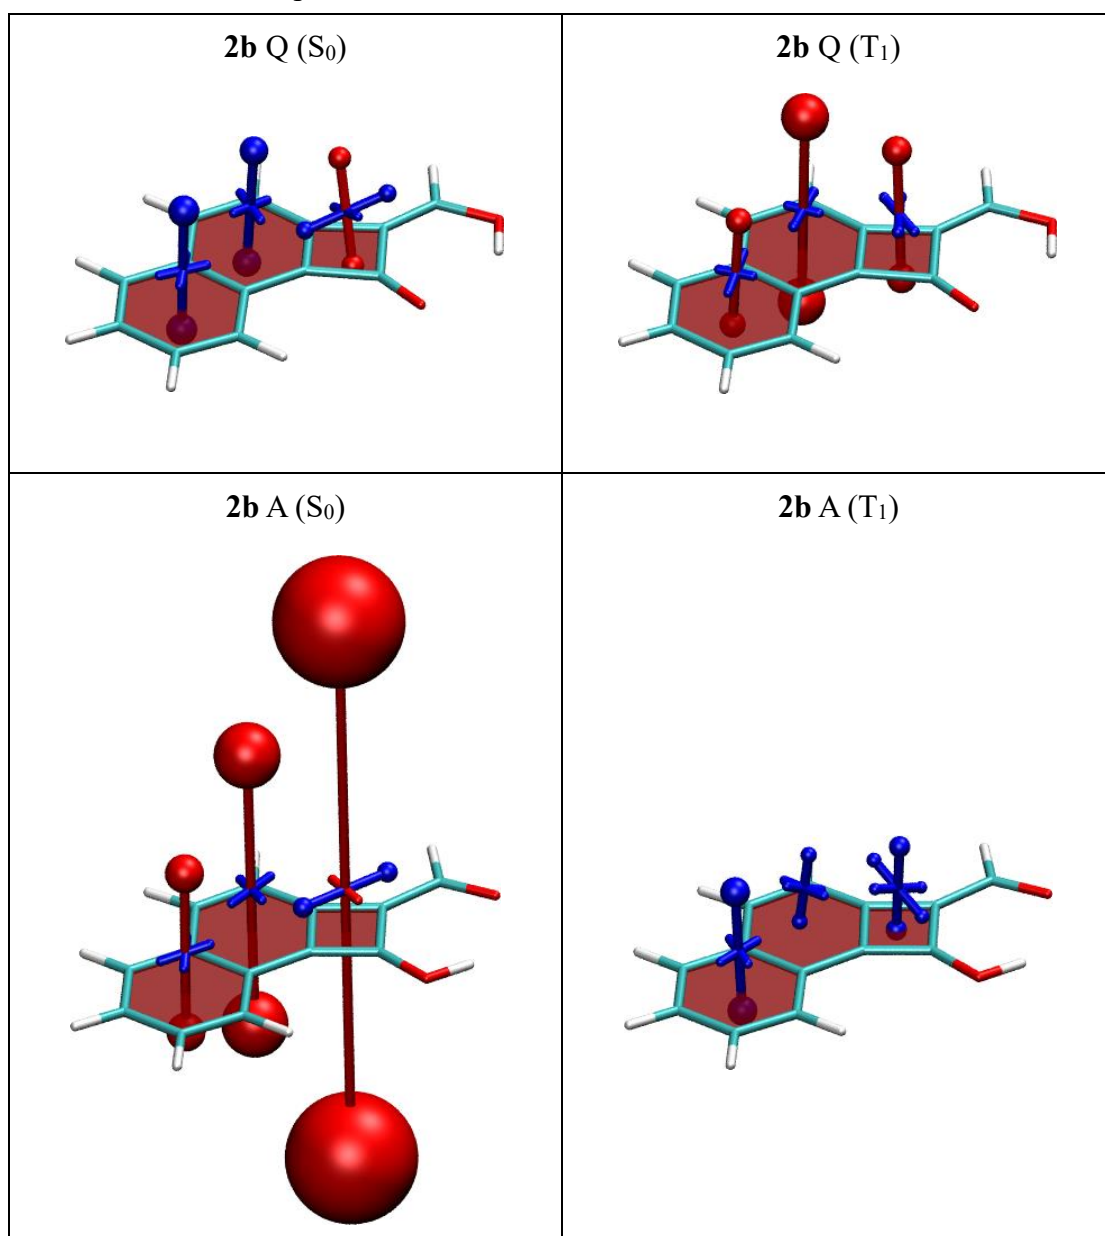

Table S6. VIST plots for Q and A form of molecule **3a** in  $S_0$  and  $T_1$  states.

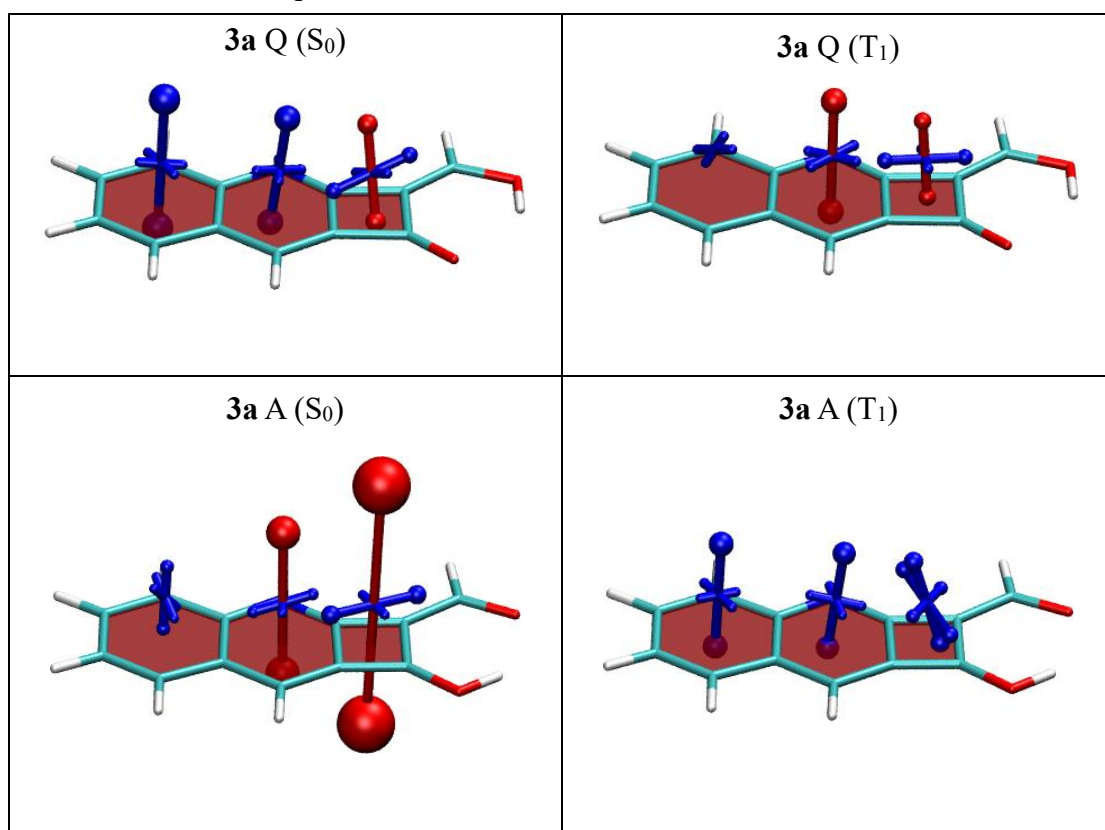

Table S7. VIST plots for Q and A form of molecule **3b** in  $S_0$  and  $T_1$  states.

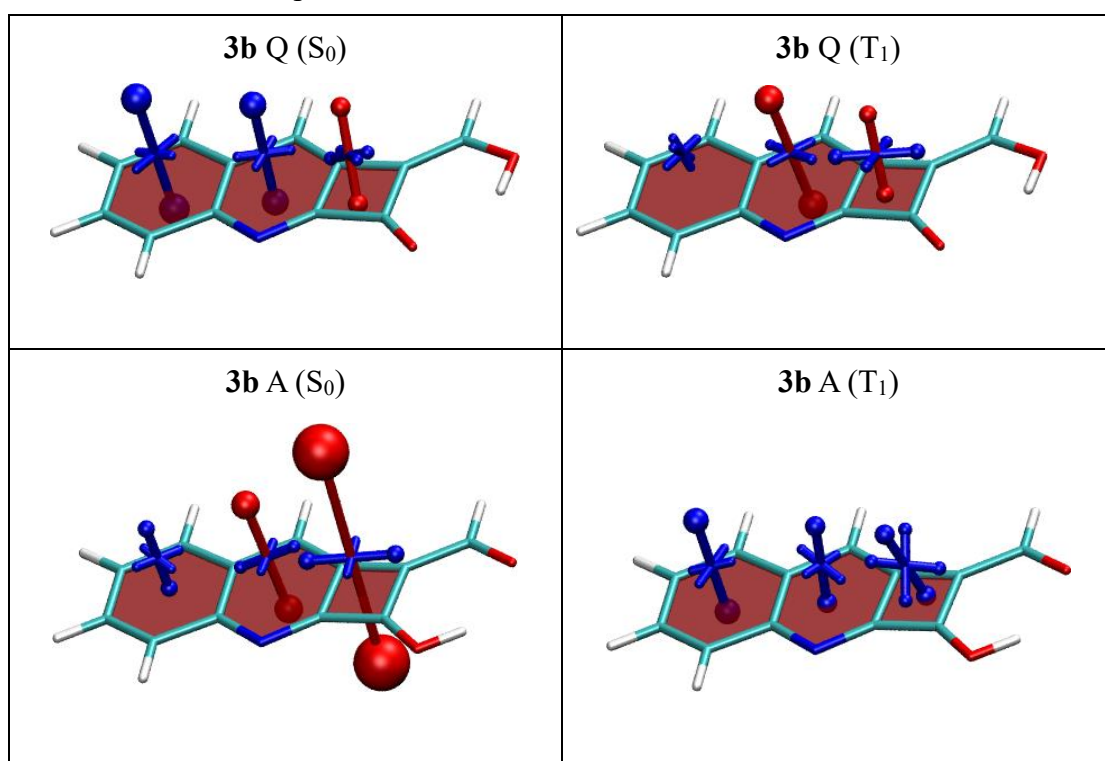



Table S8. VIST plots for Q and A form of molecule **4** in  $S_0$  and  $T_1$  states.

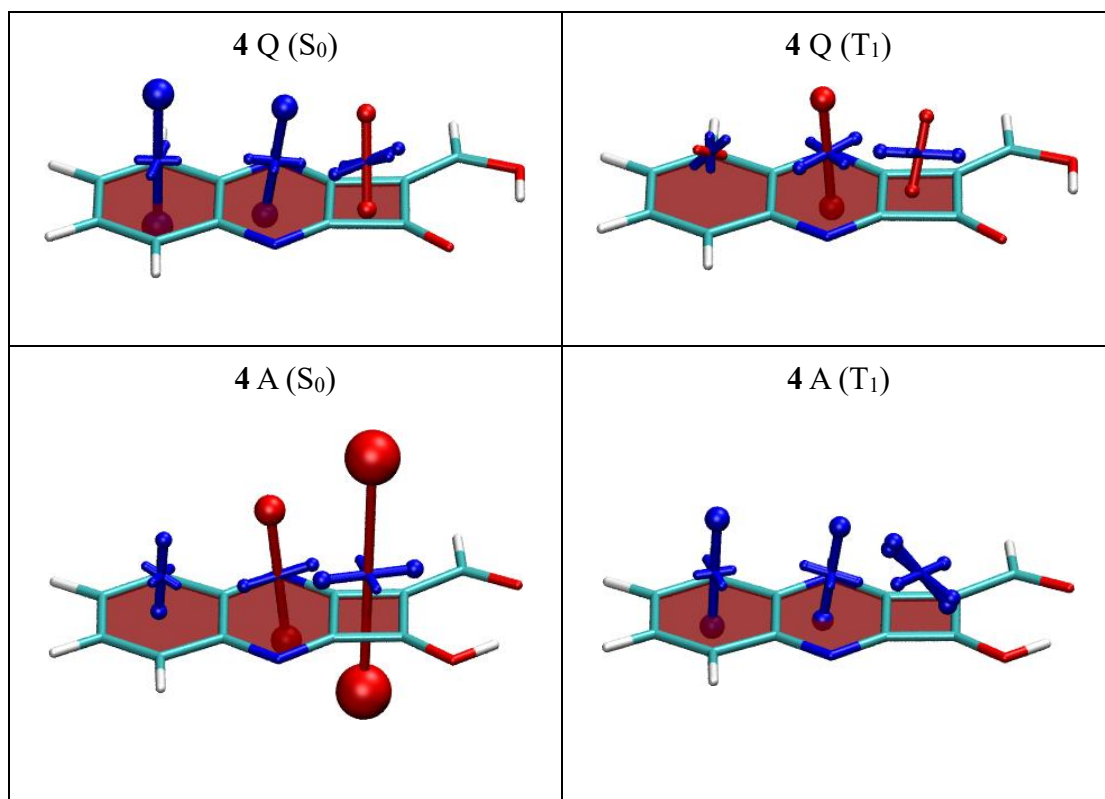

Table S9. VIST plots for Q and A form of molecule **5** in  $S_0$  and  $T_1$  states.

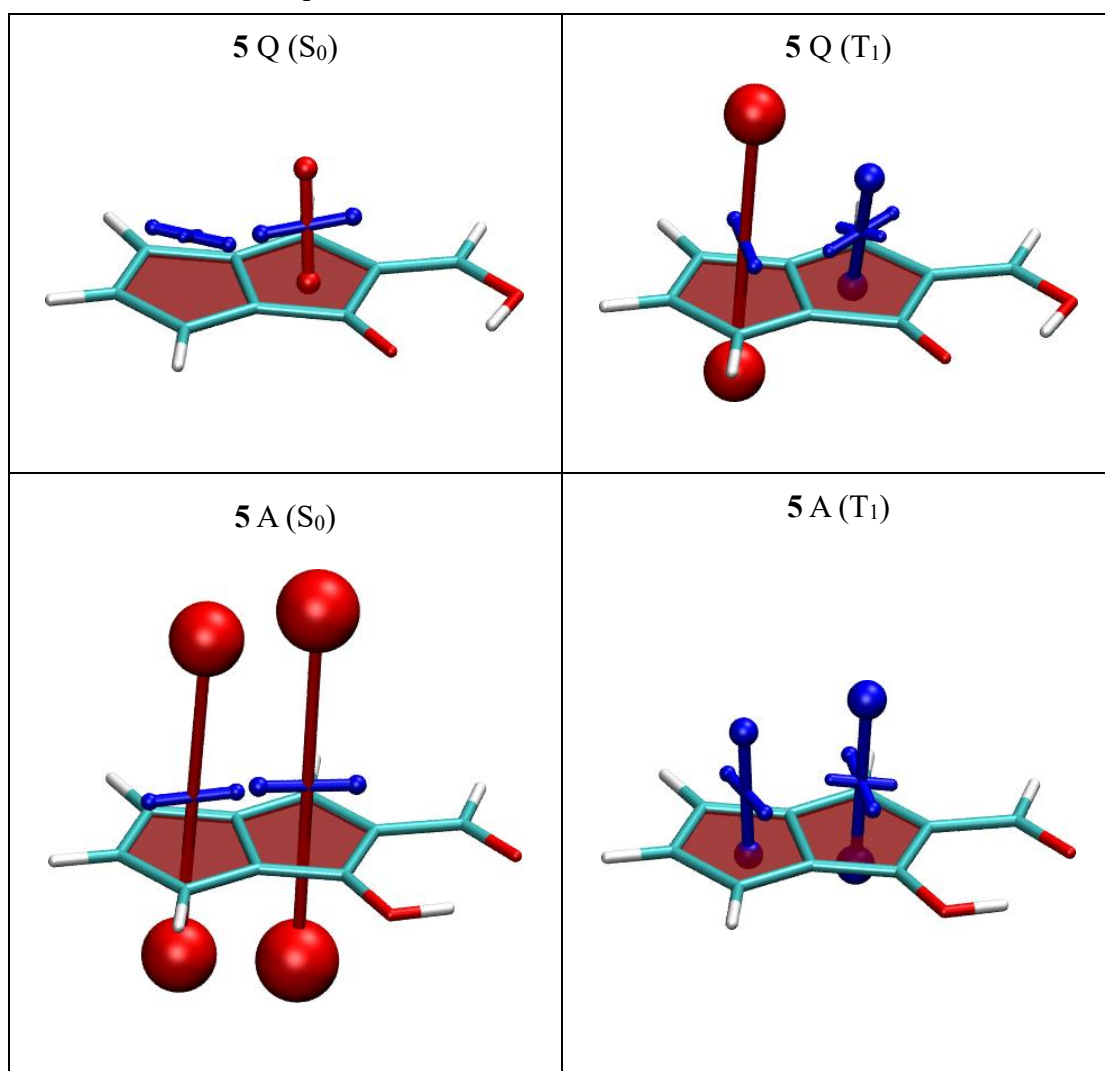

Table S10. VIST plots for Q and A form of molecule **6** in  $S_0$  and  $T_1$  states.

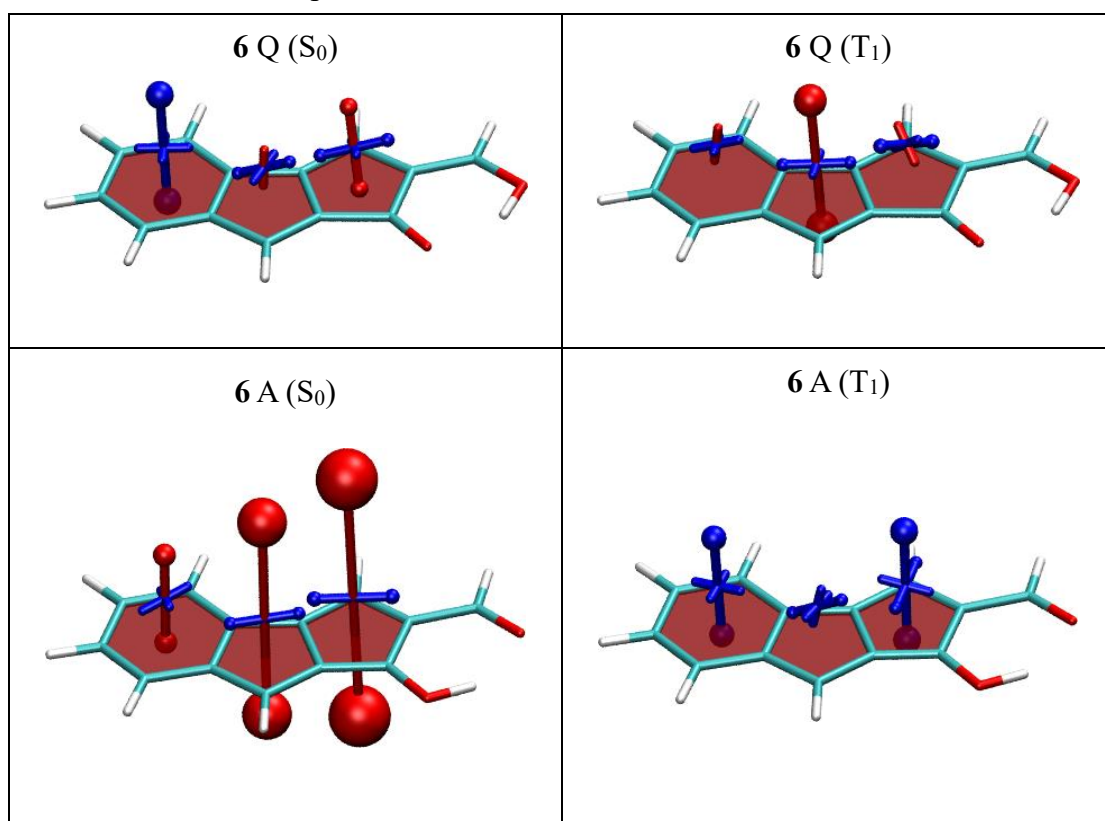

Table S11. VIST plots for Q and A form of molecule **7a** in  $S_0$  and  $T_1$  states.

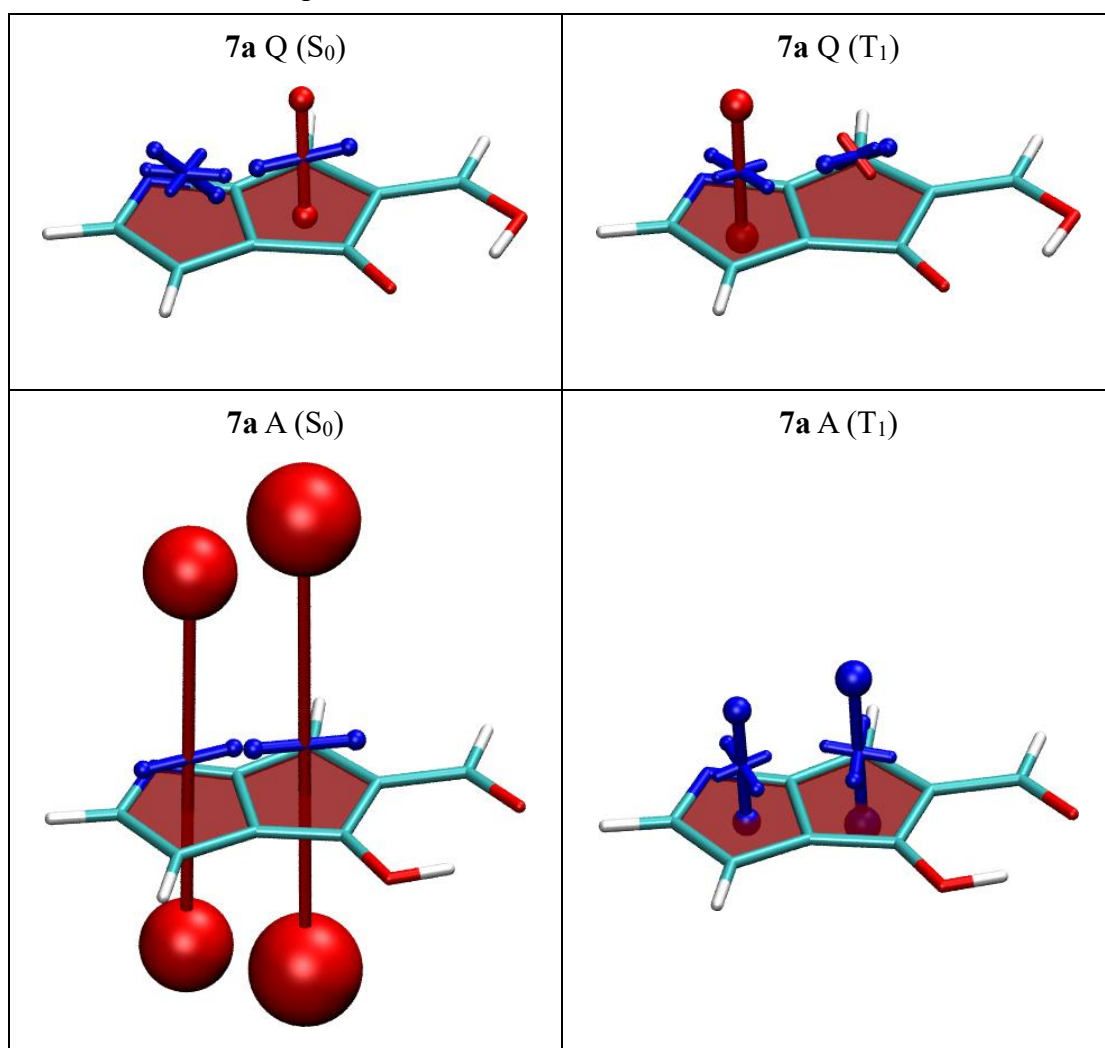

Table S12. VIST plots for Q and A form of molecule **7b** in  $S_0$  and  $T_1$  states.

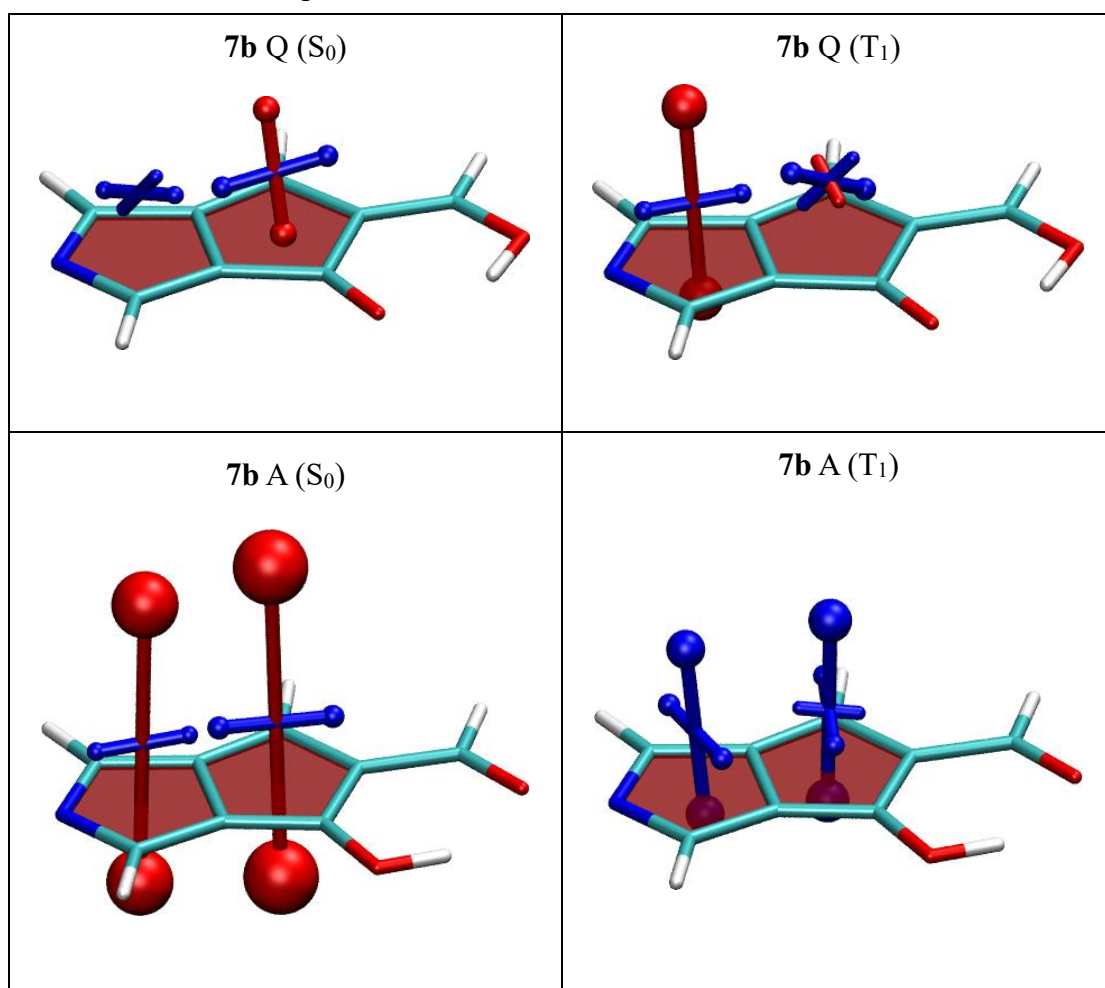

Table S13. VIST plots for Q and A form of molecule **8** in  $S_0$  and  $T_1$  states.

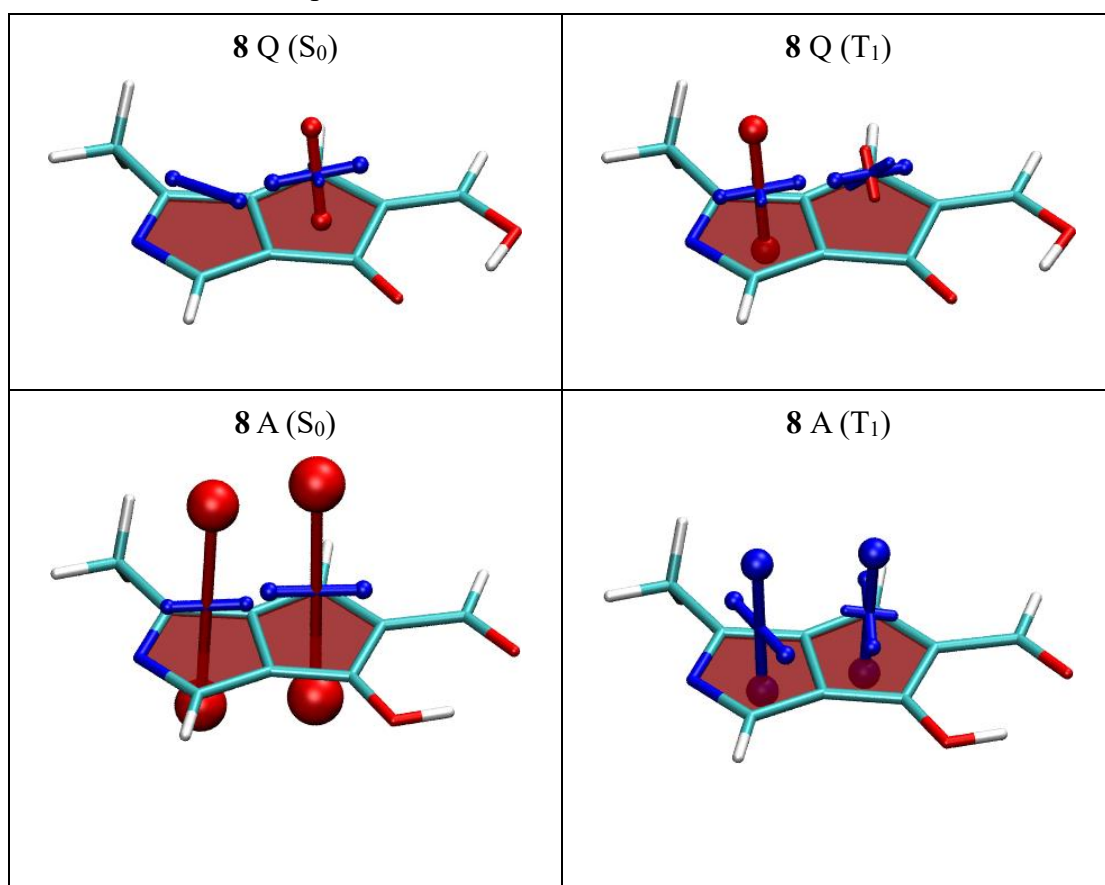

Table S14. VIST plots for Q and A form of molecule **9** in  $S_0$  and  $T_1$  states.

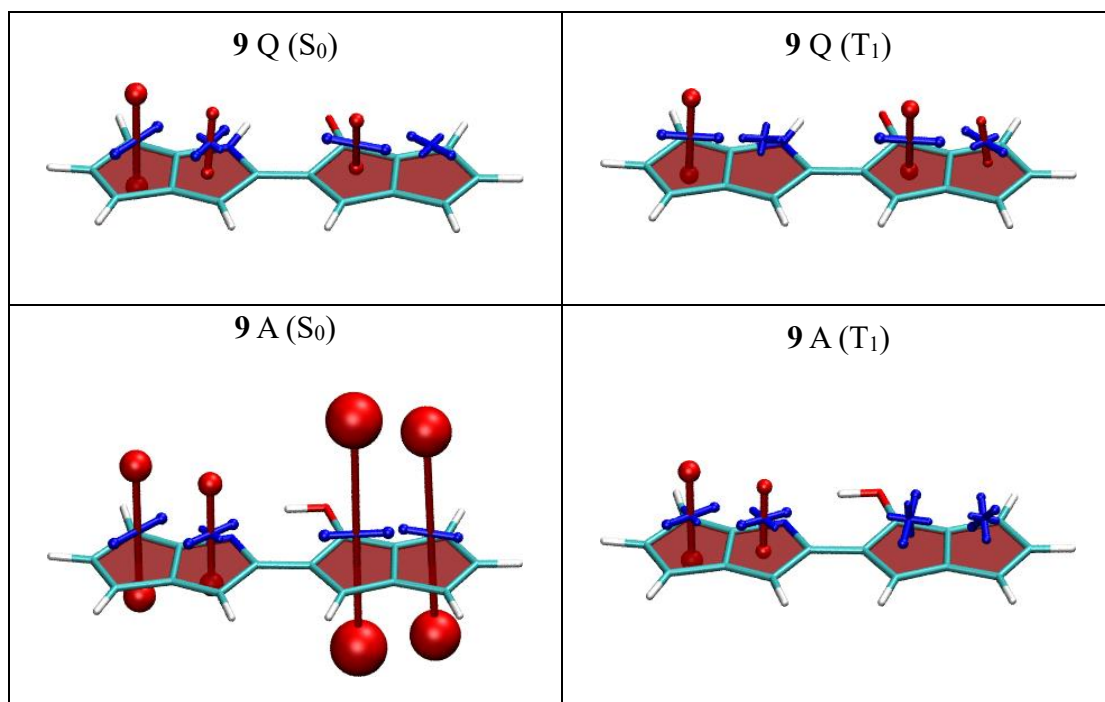

## 2. Natural transition orbitals (NTOs)

Natural transition orbitals<sup>13</sup> are computed after single point TDDFT calculation at M06-2X<sup>14</sup>/def2-TZVP level and visualized by Jmol. Note that all the NTOs of Q forms presented are at S<sub>0</sub> geometry and A forms are at S<sub>1</sub> geometry.

Table S15. Natural transition orbitals of molecule **1**. (blue/red for hole and orange/green for electron)

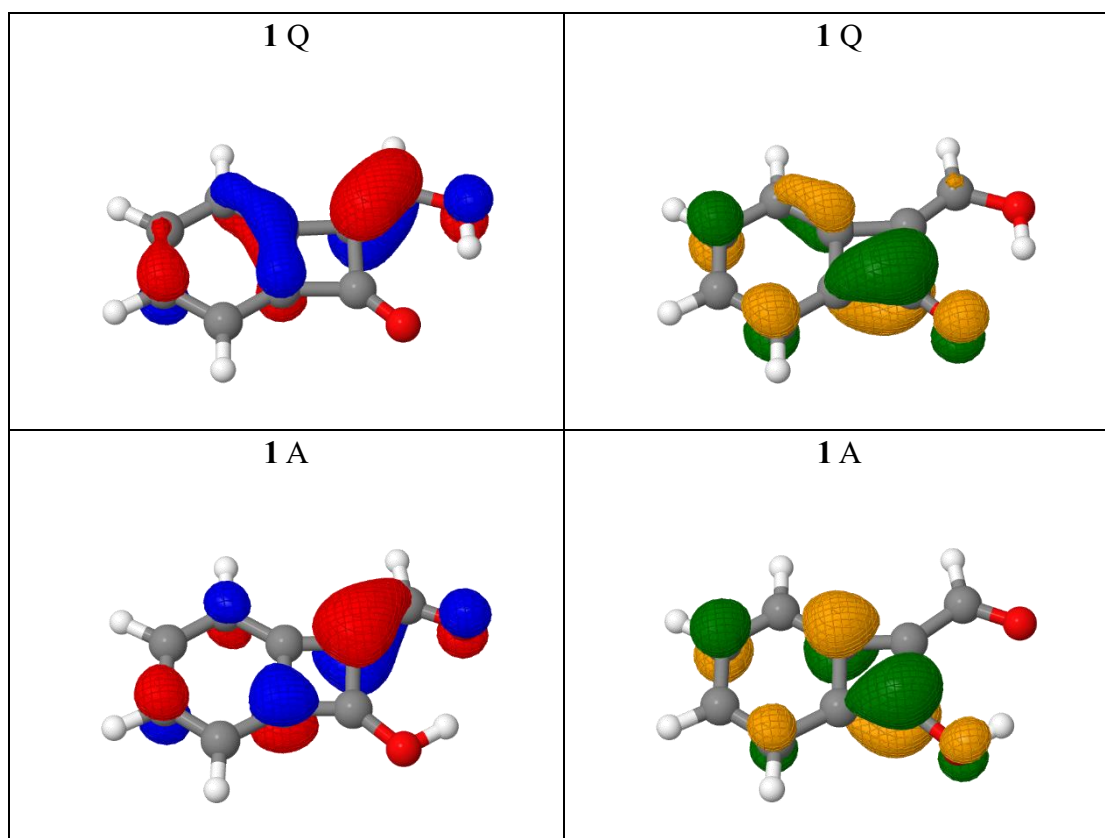

Table S16. Natural transition orbitals of molecule **2a**. (blue/red for hole and orange/green for electron)

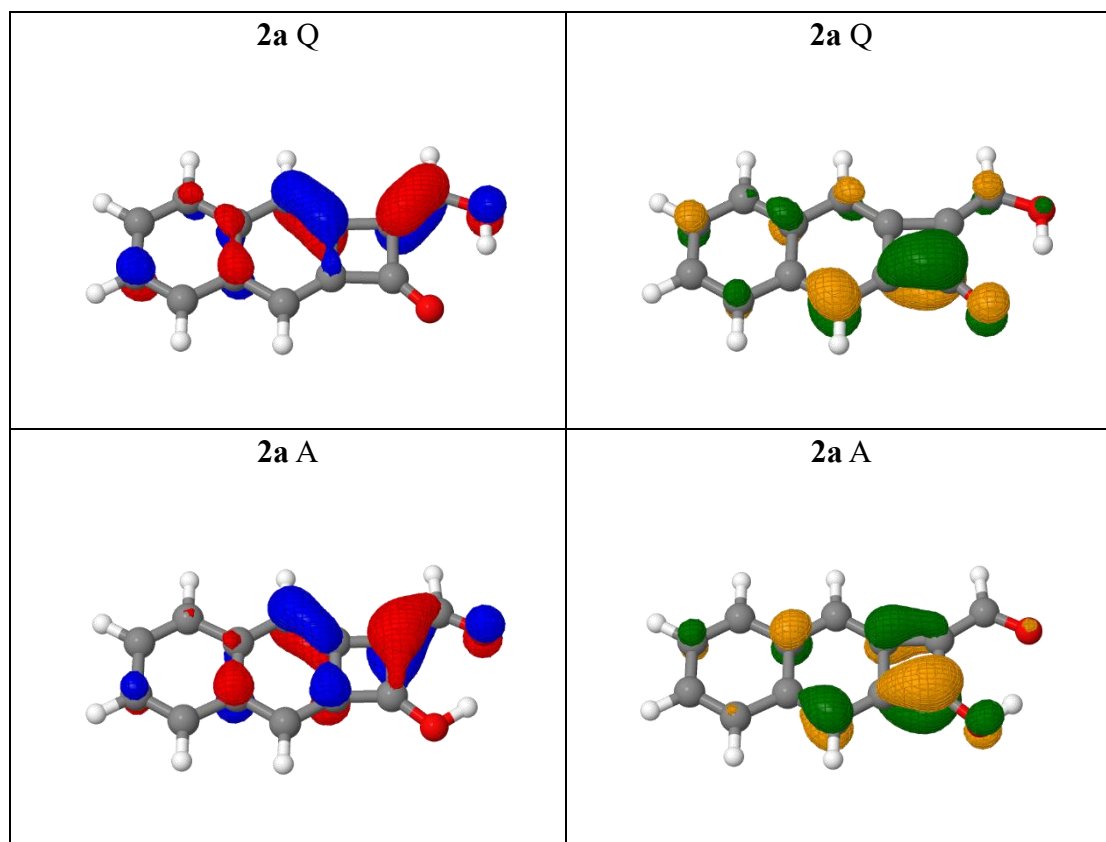



Table S17. Natural transition orbitals of molecule **2b**. (blue/red for hole and orange/green for electron)

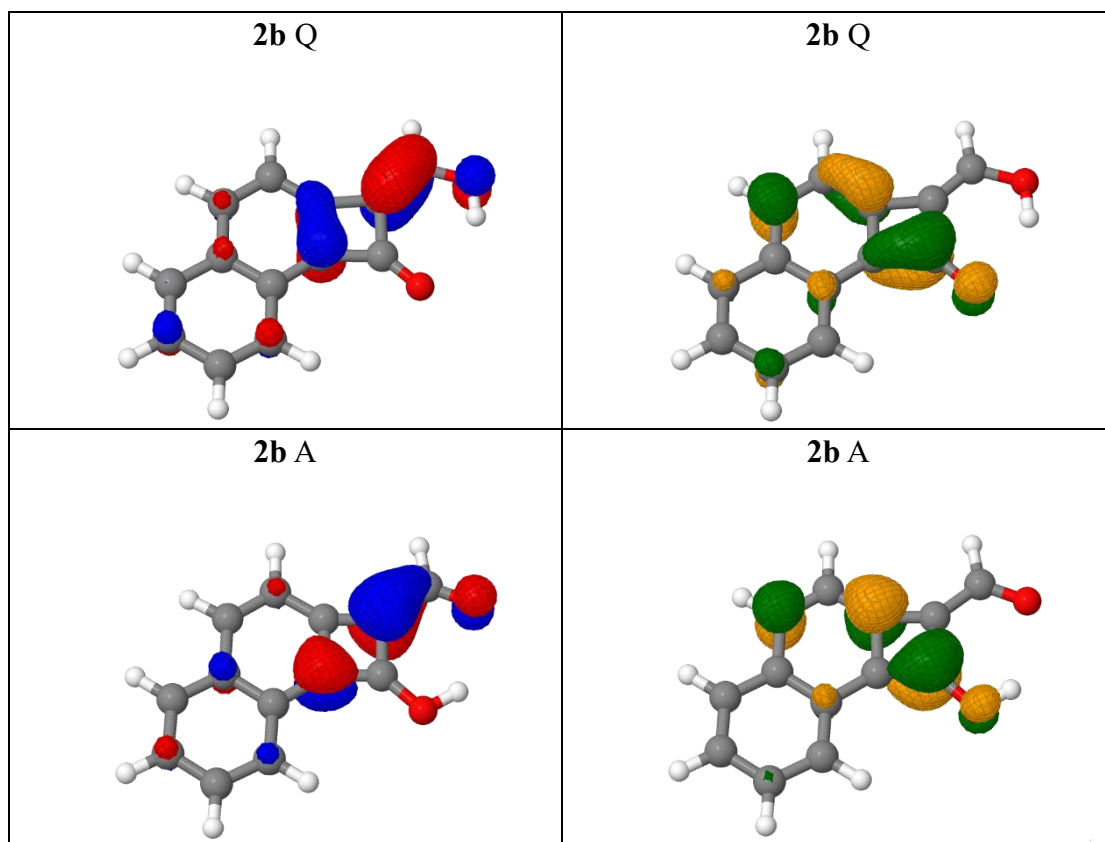

Table S18. Natural transition orbitals of molecule **3a**. (blue/red for hole and orange/green for electron)

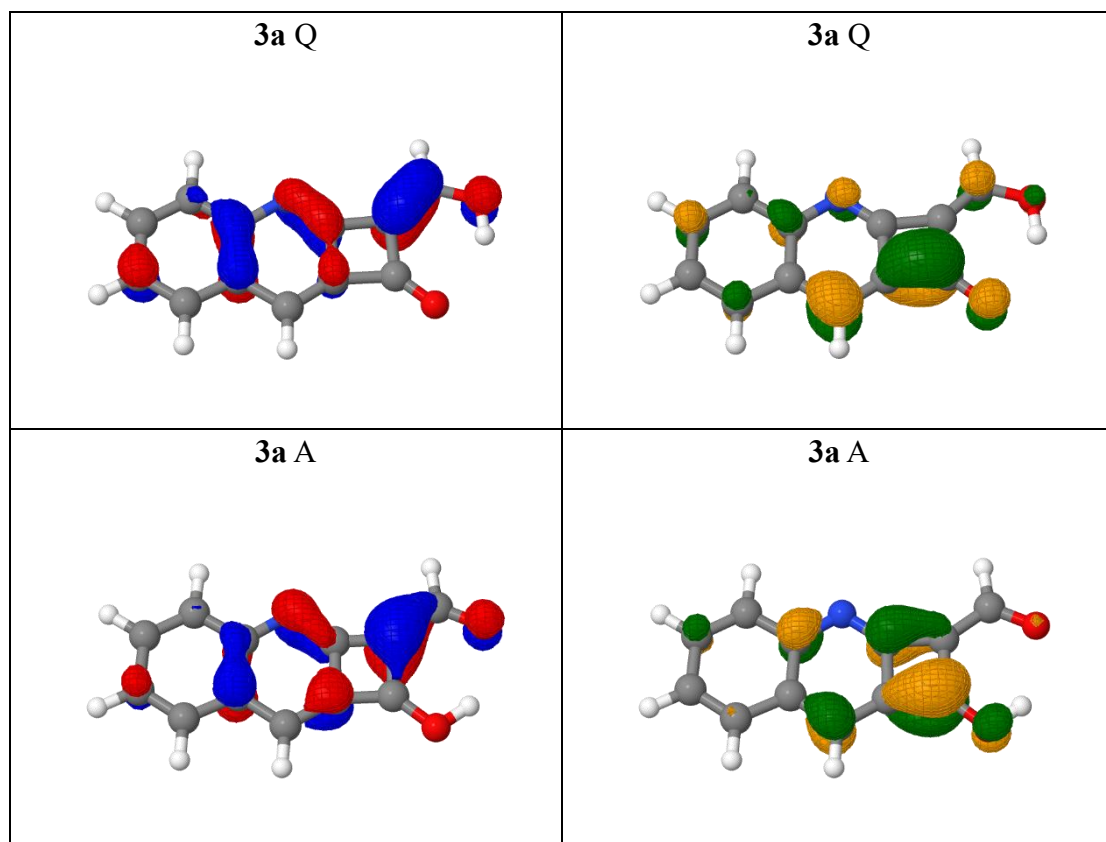

Table S19. Natural transition orbitals of molecule **3b**. (blue/red for hole and orange/green for electron)

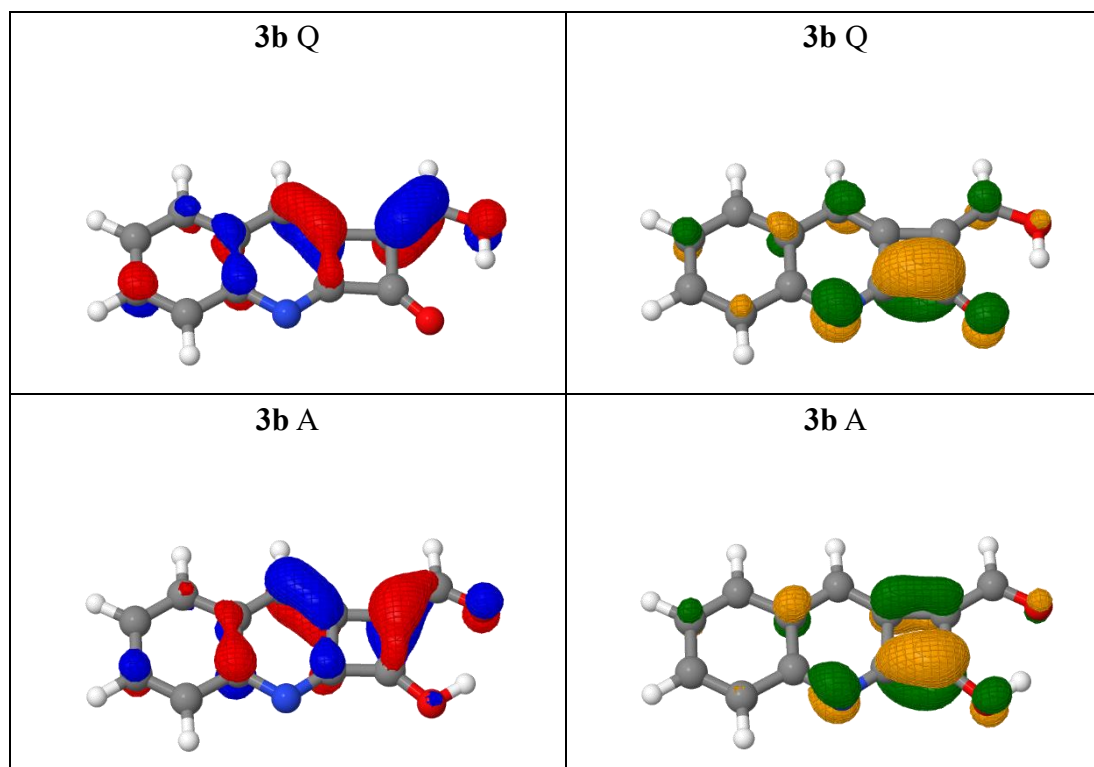

Table S20. Natural transition orbitals of molecule 4. (blue/red for hole and orange/green for electron)

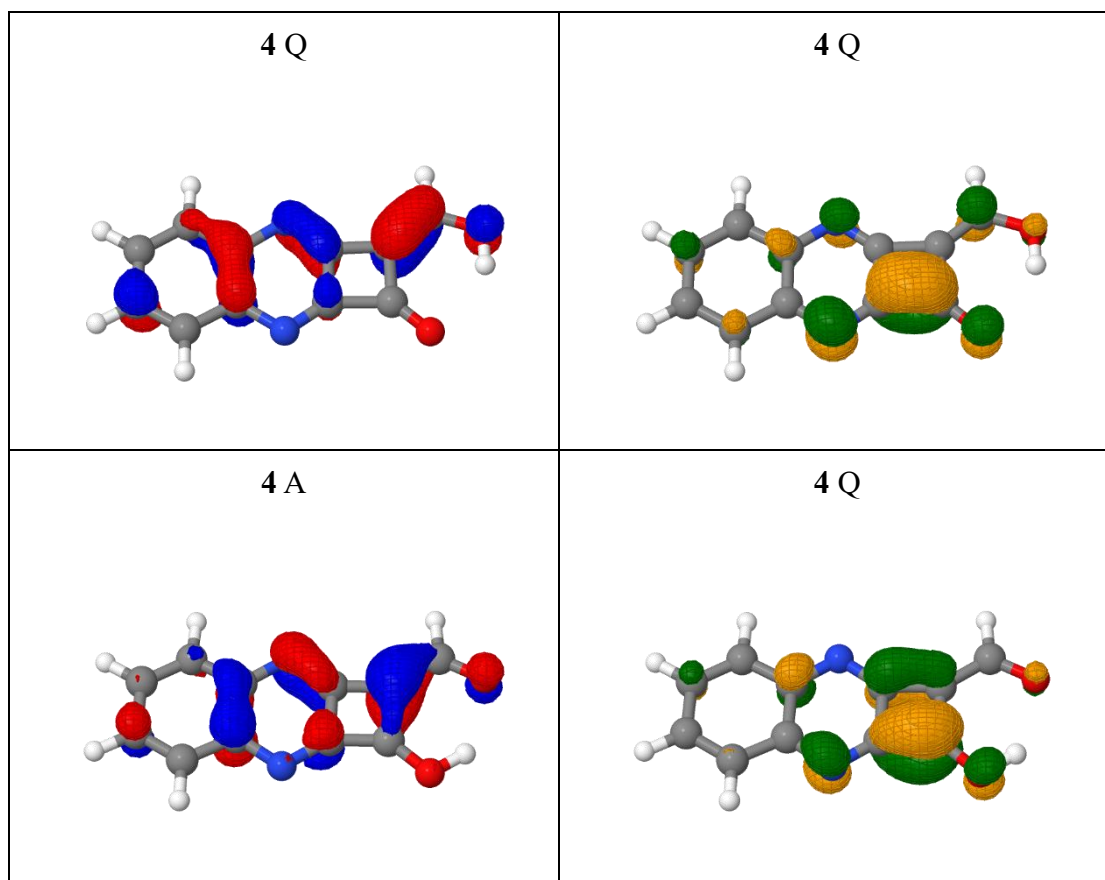

Table S21. Natural transition orbitals of molecule **5**. (blue/red for hole and orange/green for electron)

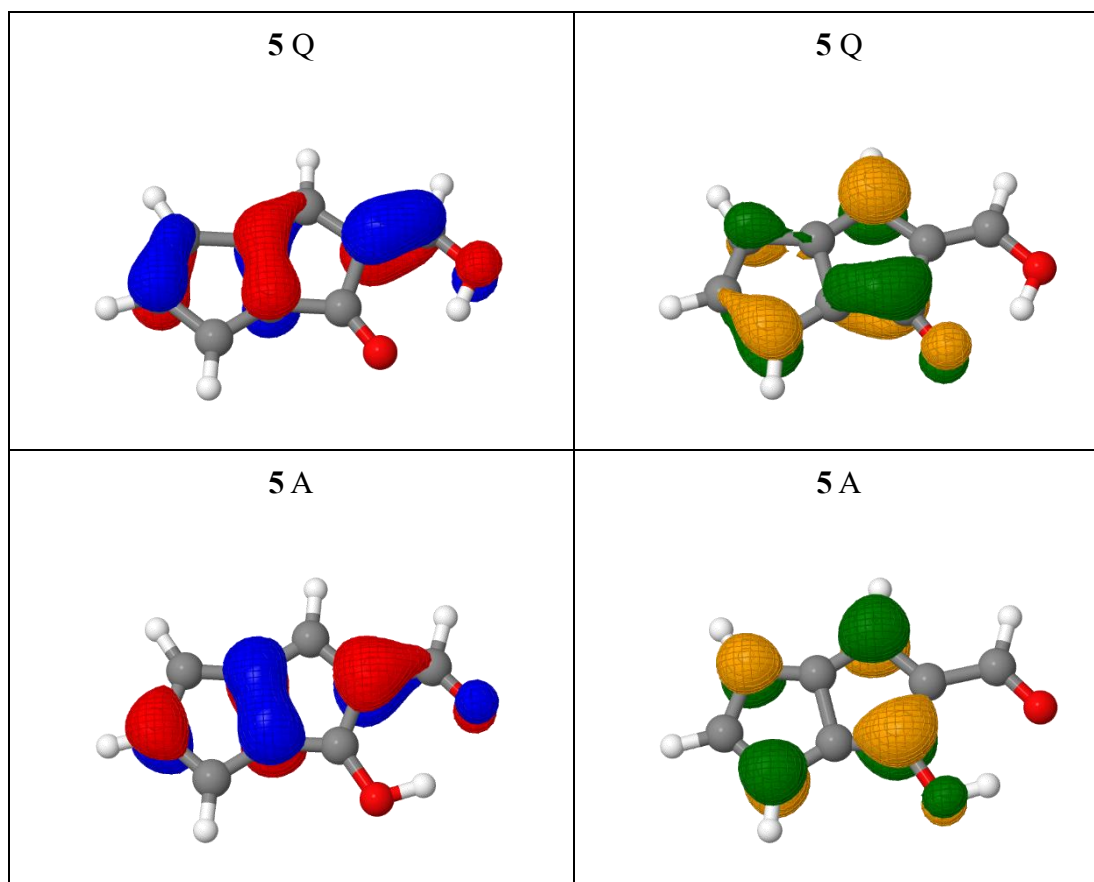

Table S22. Natural transition orbitals of molecule **6**. (blue/red for hole and orange/green for electron)

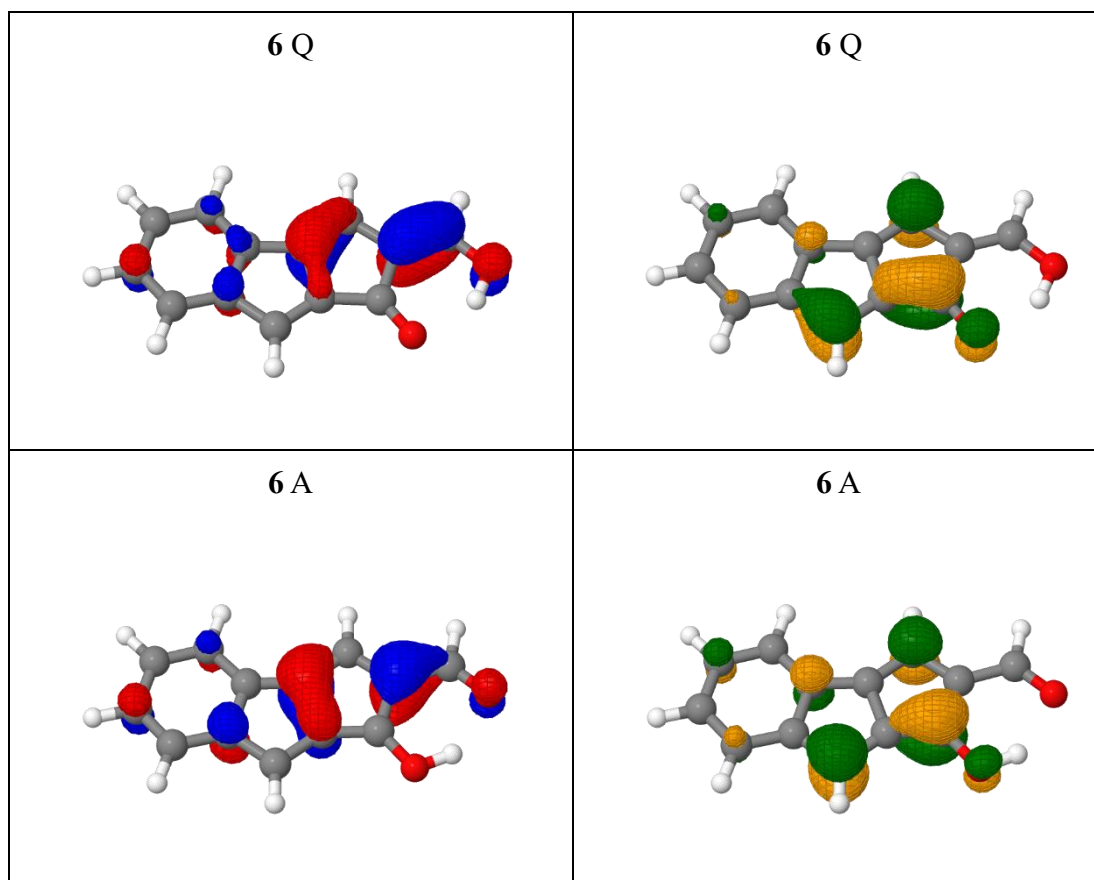

Table S23. Natural transition orbitals of molecule **7a**. (blue/red for hole and orange/green for electron)

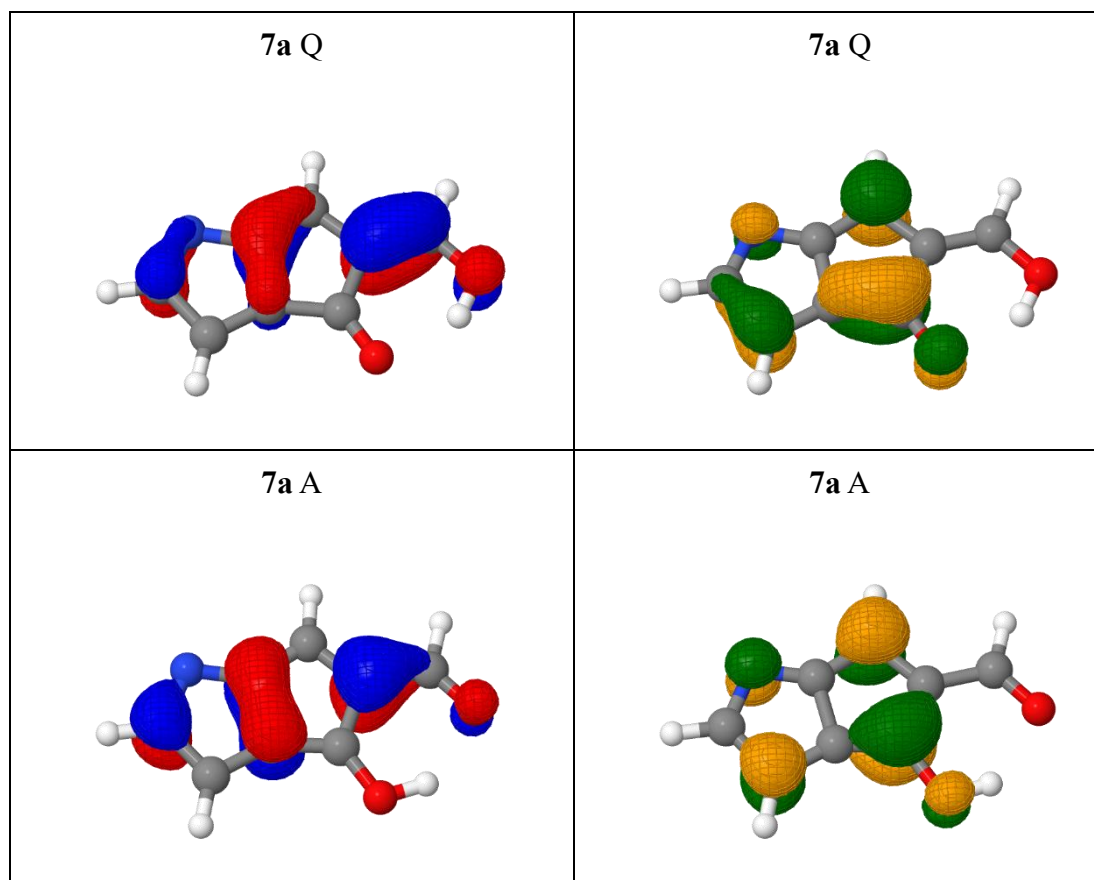

Table S24. Natural transition orbitals of molecule **7b**. (blue/red for hole and orange/green for electron)

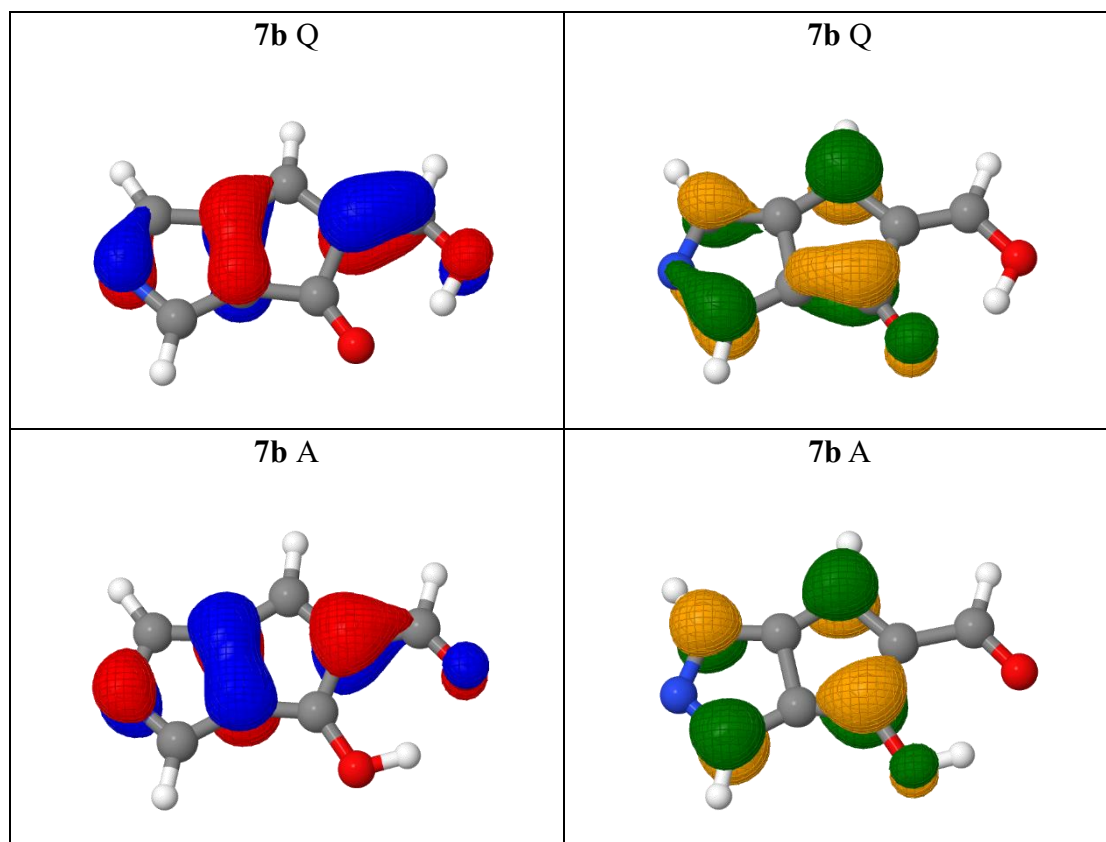



Table S25. Natural transition orbitals of molecule **8**. (blue/red for hole and orange/green for electron)

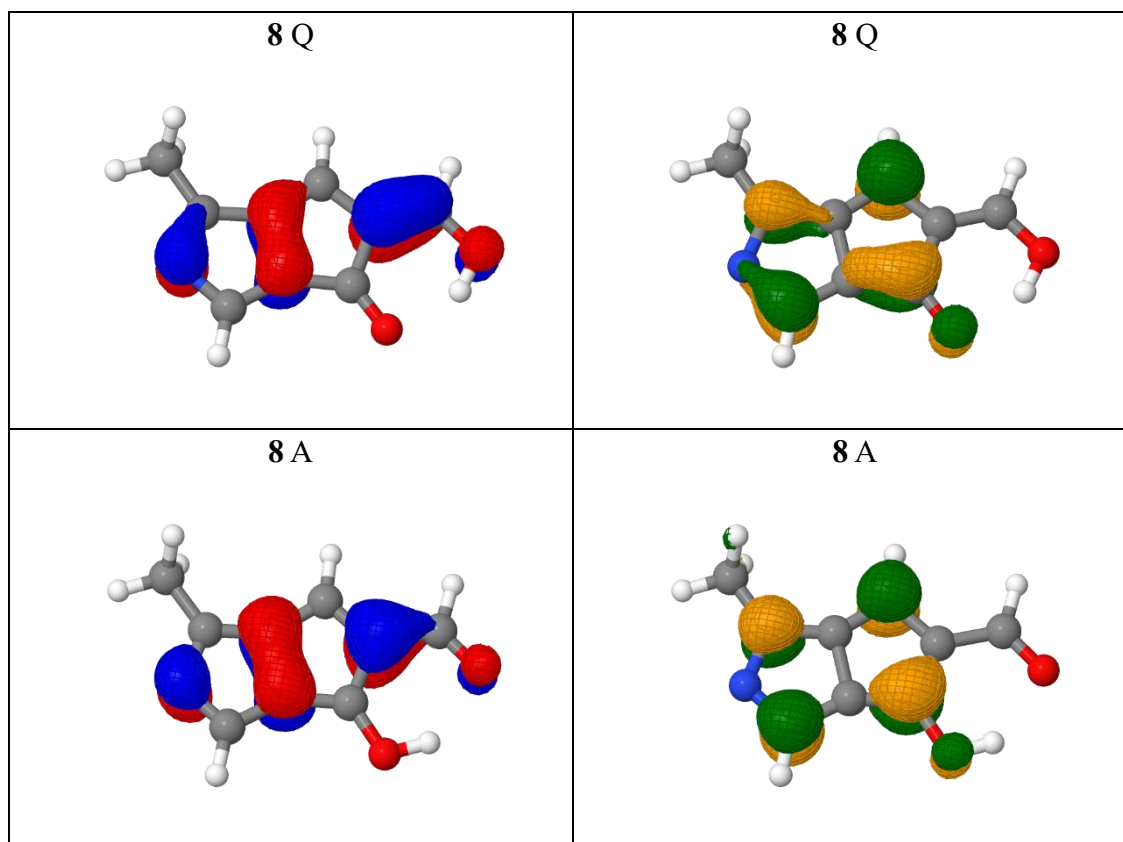

Table S26. Natural transition orbitals of molecule **9**. (blue/red for hole and orange/green for electron)

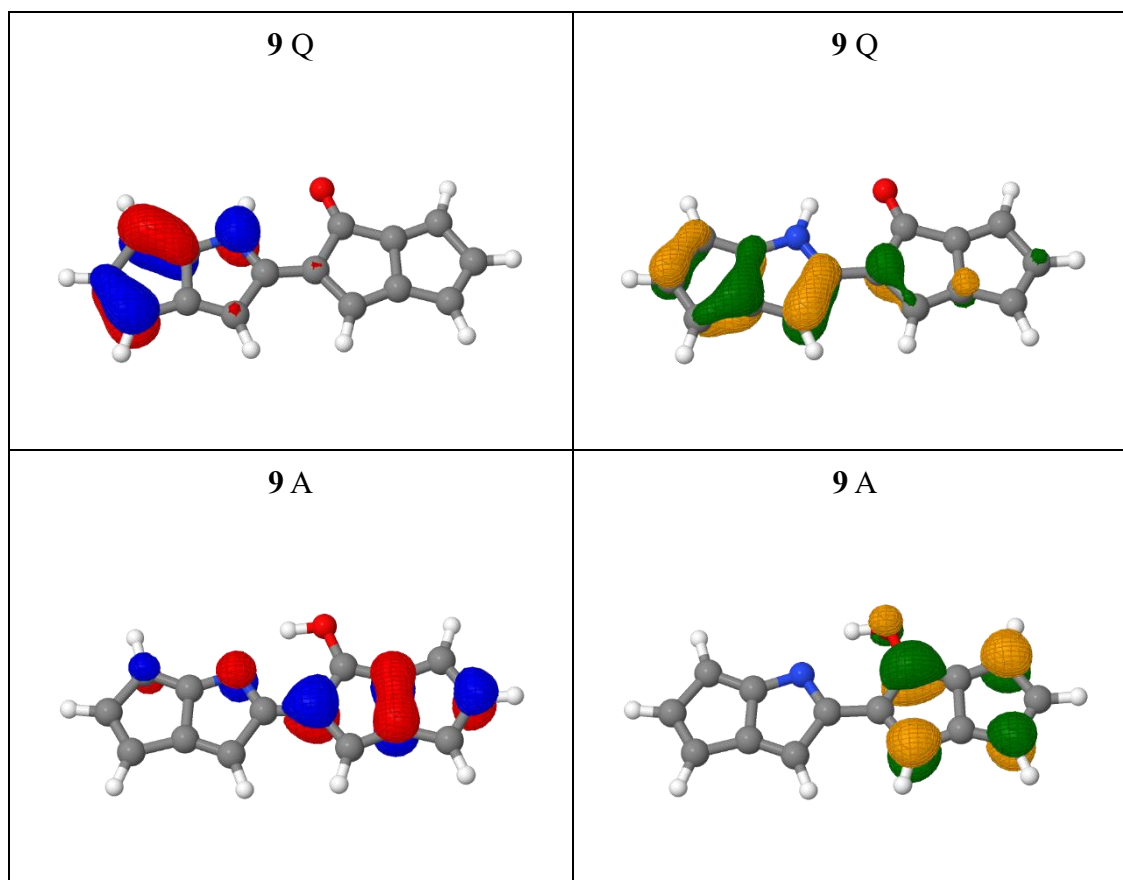

### 3. COT derivatives

Large difference between results of COT (Cyclooctatetraene) derivatives and the previous two groups of molecules were found. Considering molecules geometries, we note that for all four molecules, the COT ring of Q(S<sub>0</sub>) is not planar, whereas the planarity of A(S<sub>1</sub>) is higher, but the molecule shows a twisted structure, especially for the COT ring. Figure S1 illustrates the analysis on vertical excitations with COT derivatives. The vertical excitation energies for COT derivatives are similar among each other with only small variations. Even the absorption oscillator strengths for absorption are always small. The additional fused ring gives almost no difference on the photophysical property, and no trends can be observed.

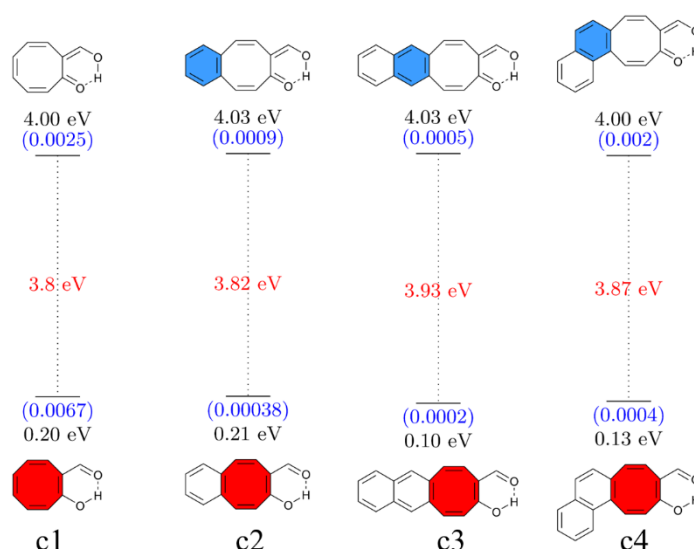

Figure S1. Vertical absorption energies in the Q form (top) and emission energies in the A form (bottom) at the M06-2X/def2-TZVP level for COT derivatives studied. Oscillator strengths (in parentheses, blue) and Stokes shifts (red) are given as well.

COT derivatives are characterized by extremely strong deshielding (antiaromaticity) of S<sub>0</sub> at their S<sub>1</sub> (A form) geometries. In line with this finding, the form S<sub>1</sub> emission energies are extremely low.

Viewing the properties of the COT derivatives we do not believe them to be suitable

for optical applications and discuss them no further.

Table S27. the out-of-plane NICS value of the COT ring in molecules c1 - c4

| molecules | NICS(0) <sub>ZZ</sub> of 8-membered ring in S <sub>0</sub> @S <sub>1</sub> (ppm) |
|-----------|----------------------------------------------------------------------------------|
| c1        | +737.3024                                                                        |
| c2        | +711.1718                                                                        |
| c3        | +5278.2774                                                                       |
| c4        | +1013.7536                                                                       |

#### 4. Ground-state tautomers

Three classes of ground-state diketo tautomers, D1, D2 and D3 are investigated as alternatives to the A and Q forms discussed in the main text. Representative structures are shown in Figure S2. It is worth noting that only tautomer D1 is reasonable for molecules **1-4** whereas molecules **5** and **6** also possess D2 forms and molecules **7-8** also have an accessible D3 form where a pyrrole ring is formed. Fig. 6 shows the energies of the most stable D-type tautomer. This refers to D1 for **1-4**, to D2 for **5** and **6**, and to D3 for **7-8**. It is notable that the D3 tautomer, which forms a pyrrole ring, possesses enhanced stability meaning that these structures will most likely to be found as D3 tautomers.

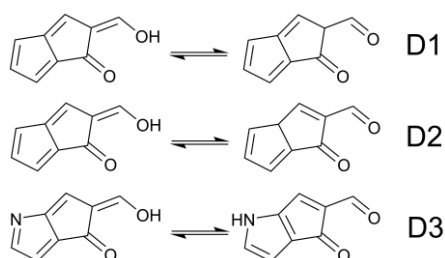

Figure S2. Chemical structures of 3 classes of tautomer investigated.

## 5. Further computational and experimental results

Table S28. Vertical energies (in eV) of o-hydroxybenzaldehyde (OHBA)<sup>15</sup>, salicylic acid (SA)<sup>16</sup>, 10-hydroxybenzo[h]quinoline (HBQ)<sup>17</sup>, benzocyclobutenedione<sup>18</sup> and [2,2'-bipyridyl]-3,3'-diol [BP(OH)<sub>2</sub>]<sup>19</sup> at the geometry of A(S<sub>0</sub>) and Q(S<sub>1</sub>) using the TDA/M06-2X/def2-TZVP and ADC(2)/def2-TZVPP methods as well as the experimental absorption maxima.

| Mol. / Geo.                 | M06-2X | ADC(2) | Exp. |
|-----------------------------|--------|--------|------|
| OHBA / A                    | 4.07   | 3.99   | 3.9  |
| OHBA / Q                    | 3.32   | 2.49   | 2.5  |
| SA / A                      | 4.80   | 4.36   | 3.9  |
| SA / Q                      | 3.62   | 2.83   | 2.8  |
| HBQ / A                     | 4.06   | 3.66   | 3.26 |
| HBQ / Q                     | 2.58   | 1.68   | 1.98 |
| Benzocyclobutenedione       | 5.08   | 4.71   | 4.48 |
| [BP(OH) <sub>2</sub> ] / DE | 4.31   | 3.92   | 3.65 |
| [BP(OH) <sub>2</sub> ] / DK | 3.18   | 2.54   | 2.43 |

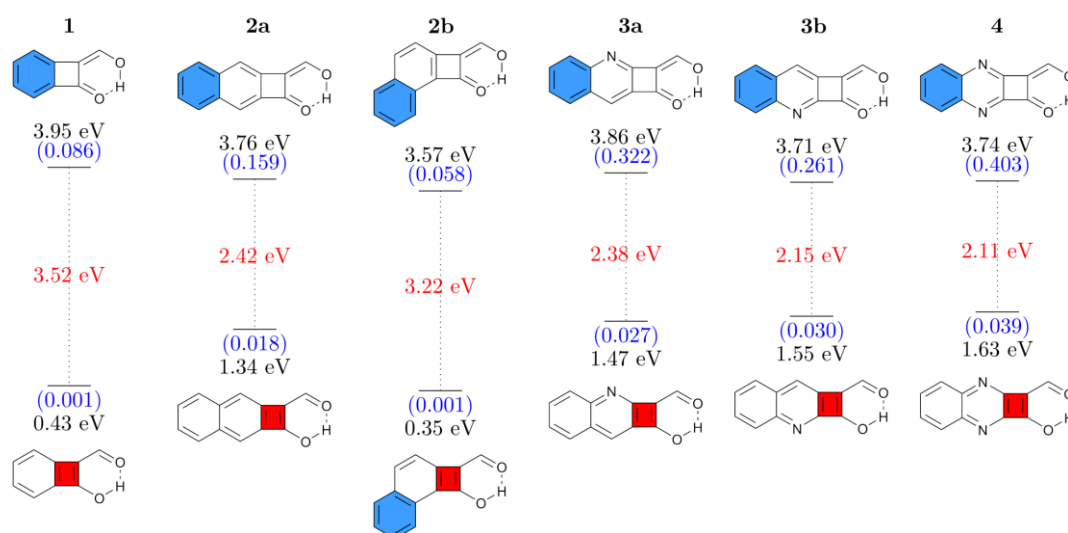

Figure S3. Vertical absorption energies in the Q form (top) and emission energies in the A form (bottom) at the M06-2X/def2-TZVP level for CBD

derivatives studied. Oscillator strengths (in parentheses, blue) and Stokes shifts (red) are given as well.

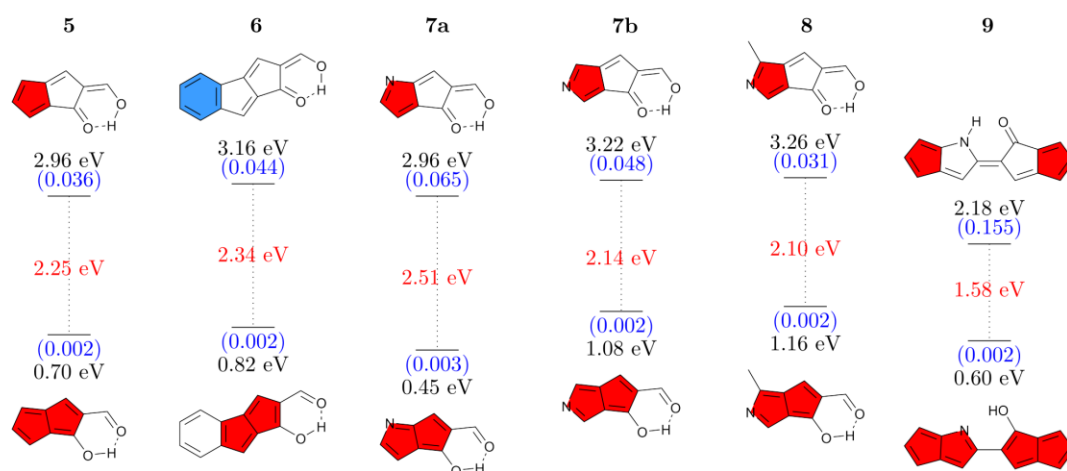

Figure S4. Vertical absorption energies in the Q form (top) and emission energies in the A form (bottom) at the M06-2X/def2-TZVP level for pentalene derivatives studied. Oscillator strengths (in parentheses, blue) and Stokes shifts (red) are given as well.

## 6. References

- (1) P. V. R. Schleyer, C. Maerker, A. Dransfeld, H. Jiao, N. J. R. Van and E. Hommes, *J. Am. Chem. Soc.*, 1996, **118**, 6317.
- (2) C. Adamo and V. Barone, *J. Chem. Phys.*, 1999, **110**, 6158–6170.
- (3) F. Weigend and R. Ahlrichs, *Phys. Chem. Chem. Phys.*, 2005, **7**, 3297–330.
- (4) M. J. Frisch, G. W. Trucks, H. B. Schlegel, G. E. Scuseria, M. A. Robb, J. R. Cheeseman, G. Scalmani, V. Barone, B. Mennucci, G. A. Petersson, H. Nakatsuji, M. Caricato, X. Li, H. P. Hratchian, A. F. Izmaylov, J. Bloino, G. Zheng, J. L. Sonnenberg, M. Hada, M. Ehara, K. Toyota, R. Fukuda, J. Hasegawa, M. Ishida, T. Nakajima, Y. Honda, O. Kitao, H. Nakai, T. Vreven, J. J. A. Montgomery, J. E. Peralta, F. Ogliaro, M. Bearpark, J. J. Heyd, E. Brothers, K. N. Kudin, V. N. Staroverov, T. Keith, R. Kobayashi, J. Normand, K. Raghavachari, A. Rendell, J. C. Burant, S. S. Iyengar, J. Tomasi, M. Cossi, N. Rega, J. M. Millam, M. Klene, J. E. Knox, J. B. Cross, V. Bakken, C. Adamo, J. Jaramillo, R. Gomperts, R. E. Stratmann, O. Yazyev, A. J. Austin, R. Cammi, C. Pomelli, J. W. Ochterski, R. L. Martin, K. Morokuma, V. G. Zakrzewski, G. A. Voth, P. Salvador, J. J. Dannenberg, S. Dapprich, A. D. Daniels, O. Farkas, J. B. Foresman, J. V. Ortiz, J. Cioslowski and D. J. Fox, *Gaussian 09, Revision E.01*, Wallingford, CT, 2013.
- (5) F. Plasser and F. Glocklhofer, *Eur. J. Org. Chem.*, 2021, **2021**, 2529–2539.
- (6) F. Plasser, *J. Chem. Phys.*, 2020, **152**, 084108.
- (7) W. Humphrey, A. Dalke and K. Schulten, *J. Mol. Graphics*, 1996, **14**, 33–38.
- (8) E. Matito, M. Duran and M. Sol, *J. Chem. Phys.*, 2005, **122**, 014109.



- (9) M. Giambiagi, M. S. D. Giambiagi, C. D. D. S. Silva and A. P. D. Figueiredo, *Phys. Chem. Chem. Phys.*, 2000, **2**, 3381–3392.
- (10) P. Bultinck, R. Ponec and S. V. Damme, *J. Phys. Org. Chem.*, 2005, **18**, 706–718.
- (11) T. A. Keith, *AIMAll (Version 19.10.12)*, 2019, TK Gristmill Software, Overland Park KS, USA.
- (12) E. Matito, *ESI-3D: Electron Sharing Indexes Program for 3D Molecular Space Partitioning*, 2014, Institute of Computational Chemistry and Catalysis, Girona, Catalonia, Spain, 2014. <http://iqc.udg.es/eduard/ESI>.
- (13) R. L. Martin, *J. Chem. Phys.*, 2003, **118**, 4775–4777.
- (14) Y. Zhao and D. G. Truhlar, *Theor. Chem. Acc.*, 2008, **120**, 215–241.
- (15) S. ichi Nagaoka, N. Hirota, M. Sumitani, K. Yoshihara, E. Lipczynska-Kochany and H. Iwamura, *J. Am. Chem. Soc.*, 1984, **106**, 6913–6916.
- (16) D. D. Pant, H. C. Joshi, P. B. Bisht and H. B. Tripathi, *Chem. Phys.*, 1994, **185**, 137–144.
- (17) C. Schrieffer, M. Barbatti, K. Stock, A. J. Aquino, D. Tunega, S. Lochbrunner, E. Riedle, R. de Vivie-Riedle and H. Lischka, *Chem. Phys.*, 2008, **347**, 446–461.
- (18) K. Lohmann, Z. S. E. Biochem, G. Kerr, E. W. Huber and T. W. Sutherland, *J. Biol. Chem.*, 1957, **233**, 3608.
- (19) E. S. S. Iyer and A. Datta, *J. Phys. Chem. B*, 2012, **116**, 5302–5307.
